# Supplementary material for: OsLG3 contributing to rice grain length and yield was mined by Ho-LAMap
Source: Springer Nature journal article supplement (doi:10.1186/s12915-017-0365-7), 2017-04-06

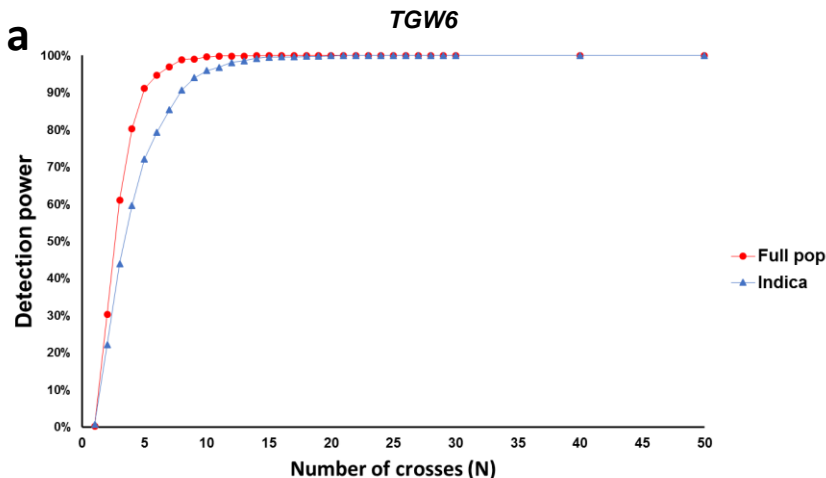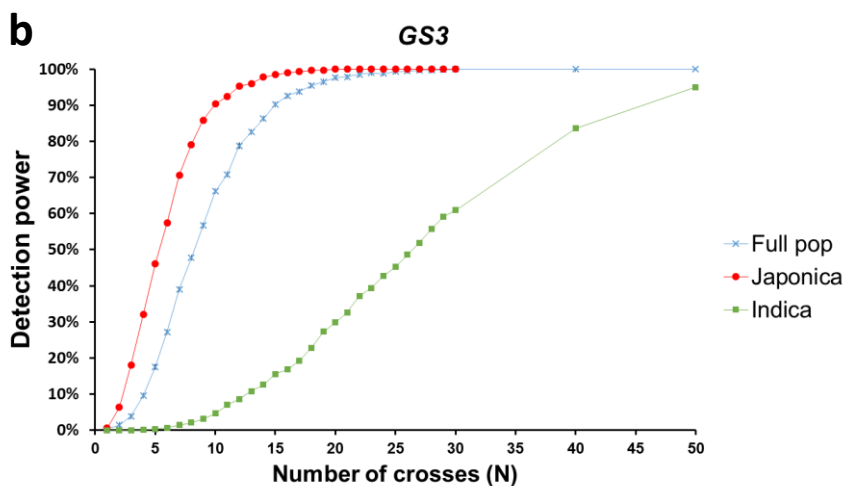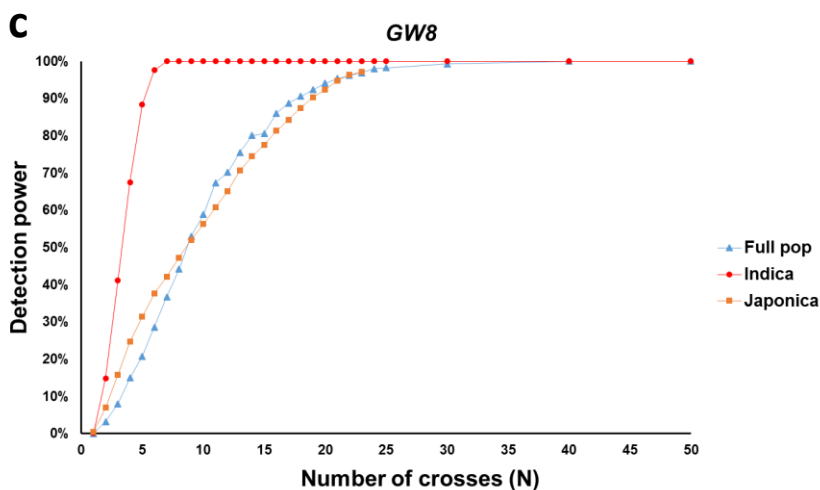

Supplement: 12915_2017_365_MOESM14_ESM.pdf [file 12915_2017_365_MOESM14_ESM.pdf]
